# Supplementary material
Source: PubMed Central journal article supplement (PMC3575642)
Supplement: NIHMS430428-supplement-Supplemental.pdf [file NIHMS430428-supplement-Supplemental.pdf]

Supplementary table1. Comparison of clinicopathologic characteristics between patients studied (N=188) and patients not studied (N=934) from E2290 study

|                     | In this study | Not in this study | <i>P</i> value |
|---------------------|---------------|-------------------|----------------|
| Male (%)            | 65%           | 61%               | 0.26           |
| Age>65 (%)          | 50%           | 40%               | 0.02           |
| White (%)           | 89%           | 84%               | 0.29           |
| Distal cancer (%)   | 65%           | 61%               | 0.28           |
| With Liver Mets (%) | 77%           | 77%               | 0.85           |
| With Nodal Mets (%) | 38%           | 35%               | 0.36           |
| PS-0 (%)            | 50%           | 46%               | 0.52           |

Supplementary Table 2. Correlation between methylation of each marker by Spearman correlation analysis (r and *P* value-two tailed)

|        | MINT1 | MINT2        | MINT31                     | P16                         | P14                         | hMLH1                       |
|--------|-------|--------------|----------------------------|-----------------------------|-----------------------------|-----------------------------|
| MINT1  |       | 0.15<br>N.S. | 0.24<br>( <i>P</i> =0.002) | 0.23<br>( <i>P</i> =0.003)  | 0.20<br>( <i>P</i> =0.009)  | 0.07<br>N.S.                |
| MINT2  |       |              | 0.12<br>N.S.               | 0.11<br>N.S.                | -0.07<br>N.S.               | 0.03<br>N.S.                |
| MINT31 |       |              |                            | 0.47<br>( <i>P</i> <0.0001) | 0.30<br>( <i>P</i> <0.0001) | 0.20<br>( <i>P</i> =0.008)  |
| P16    |       |              |                            |                             | 0.19<br>( <i>P</i> =0.01)   | 0.07<br>N.S.                |
| P14    |       |              |                            |                             |                             | 0.41<br>( <i>P</i> <0.0001) |

N.S.: not statistically significant

Supplementary table3. The adjustment covariates with their HR/*P* values used in multivariate analysis model

| Covariate         | MINT1       | MINT2       | MINT31      | P16         | P14         | MLH1        | SUM         | MITN31+P16+P14 |
|-------------------|-------------|-------------|-------------|-------------|-------------|-------------|-------------|----------------|
| Location (distal) | 1.57/.019   | 1.65/.007   | 1.79/.003   | 1.69/.004   | 1.68/.006   | 1.65/.008   | 1.60/.010   | 1.61/.022      |
| Liver Mets        | 0.91/.68    | 0.97/.91    | 0.96/.83    | 1.01/.97    | 0.94/.78    | 0.98/.91    | 0.95/.81    | 0.92/.71       |
| Node Mets         | 1.14/.50    | 1.24/.23    | 1.12/.30    | 1.25/.21    | 1.21/.29    | 1.26/.21    | 1.22/.27    | 1.15/.48       |
| PS=1              | 2.43/<.0001 | 2.01/.0002  | 2.10/.0001  | 1.97/.0003  | 1.88/.001   | 2.00/.0003  | 2.03/.0002  | 2.30/<.0001    |
| PS=2              | 7.69/<.0001 | 5.52/<.0001 | 5.85/<.0001 | 4.84/<.0001 | 4.92/<.0001 | 5.50/<.0001 | 5.31/<.0001 | 6.02/<.0001    |
| Gender (male)     | 0.82/.34    | 1.03/.87    | 1.12/.54    | 1.09/.64    | 1.01/.94    | 1.04/.85    | 1.08/.66    | 0.98/.90       |
| Age>65            | 1.05/.82    | 1.08/.67    | 1.06/.76    | 1.07/.71    | 1.13/.48    | 1.11/.57    | 1.09/.63    | 1.07/.73       |
| Black vs White    | 1.16/.69    | 0.96/.90    | 0.97/.94    | 0.99/.98    | 1.00/.99    | 0.99/.97    | 0.98/.96    | 1.25/.55       |
| Hispanic vs White | 0.65/.30    | 0.87/.70    | 1.27/.55    | 0.80/.53    | 0.77/.49    | 0.85/.66    | 0.88/.73    | 0.69/.44       |
